# Supplementary material
Source: PubMed Central journal article supplement (PMC11497158)

## Supporting Information

### **The Natural Products Withaferin A and Withanone From the Medicinal Herb *Withania somnifera* are Covalent Inhibitors of the SARS-CoV-2 Main Protease**

Shayantani Chakraborty<sup>‡</sup>, Dibyendu Mallick<sup>†</sup>, Mausumi Goswami<sup>¥</sup>, F. Peter Guengerich<sup>¶</sup>, Anindita Chakraborty<sup>‡\*</sup>, and Goutam Chowdhury<sup>#\*</sup>

<sup>‡</sup>Department of Life Science, Shiv Nadar University, Greater Noida, UP, India

<sup>†</sup>Department of Chemistry, Presidency University, Kolkata, India

<sup>¥</sup>Department of Chemistry, School of Advanced Sciences, Vellore Institute of Technology, Vellore, TN, India

<sup>¶</sup>Department of Biochemistry, Vanderbilt University School of Medicine, Nashville, TN, USA

<sup>#</sup>Independent Researcher, Greater Noida, UP, India

#### **Contents:**

1. Figure S1: LC-HRMS spectra of win-Cys, win-GSH, wifA-Cys and wifA-GSH adducts
2. Figure S2: LC-MSMS spectra and fragmentation analysis of win-Cys, win-GSH, wifA-Cys and wifA-GSH adducts
3. Figure S3: Effect of win and wifA on HepG2 and A549 cells
4. Figure S4: Expression and purification of M<sup>pro</sup>
5. Figure S5: Inhibition of protease activity of M<sup>pro</sup> by wifA
6. Figure S6: Non-covalent binding of win-GSH-epoxide and wifA-GSH-epoxide at the active site of the SARS-CoV-2 cysteine protease M<sup>pro</sup> using *in silico* docking studies.

**Figure S1:** LC-HRMS spectra of win-Cys, win-GSH, wifA-Cys and wifA-GSH adducts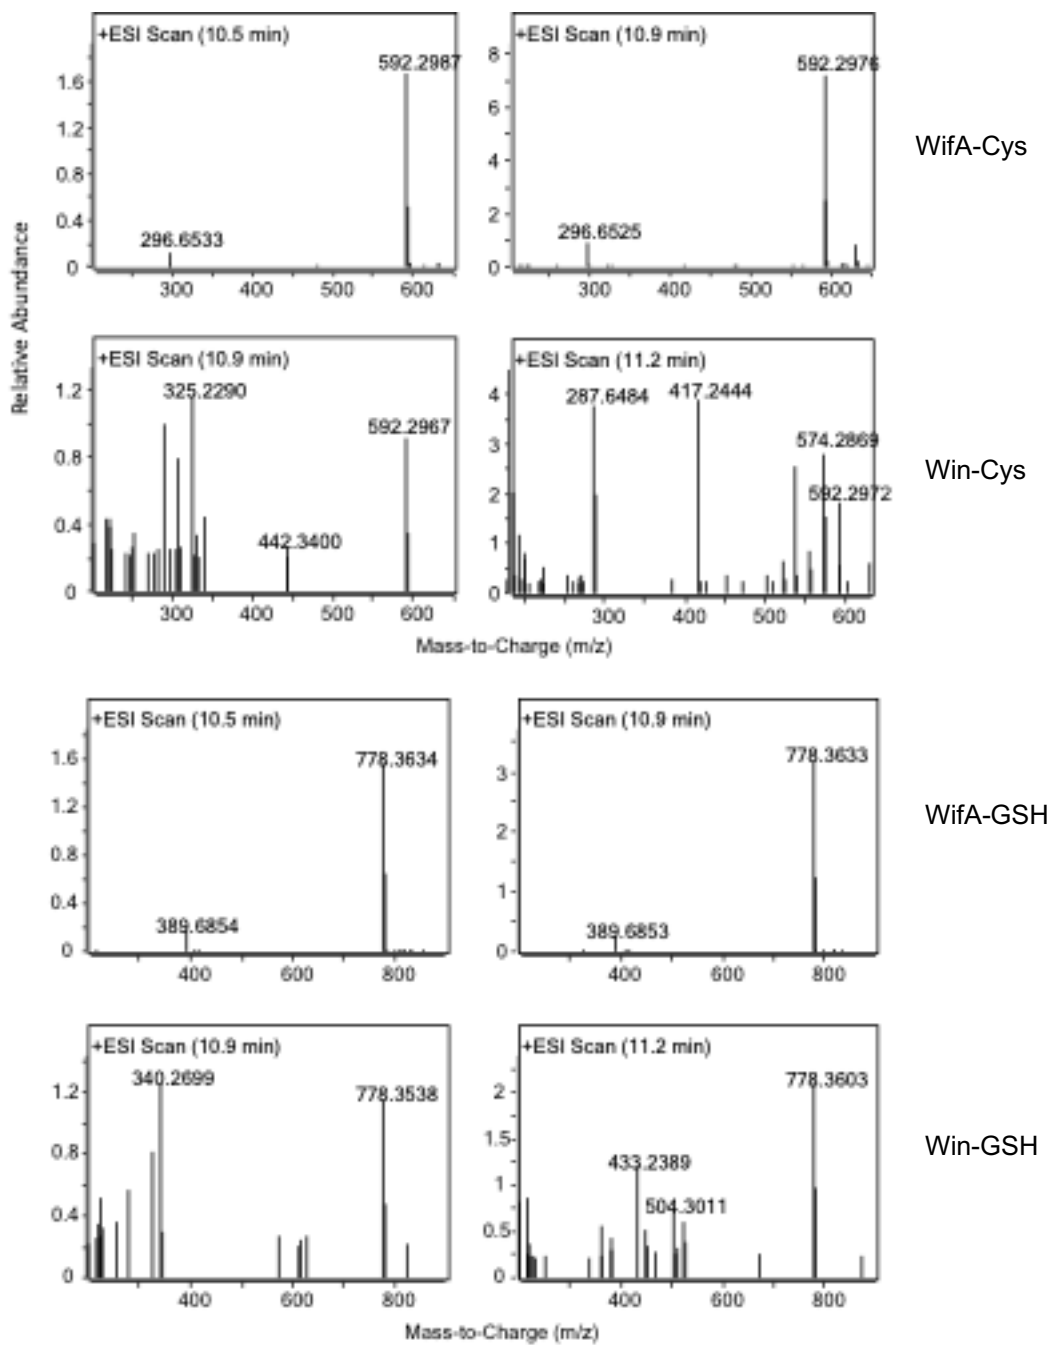



**Figure S2:** LC-MS/MS spectra and fragmentation analysis of win-Cys, win-GSH, wifA-Cys and wifA-GSH adducts

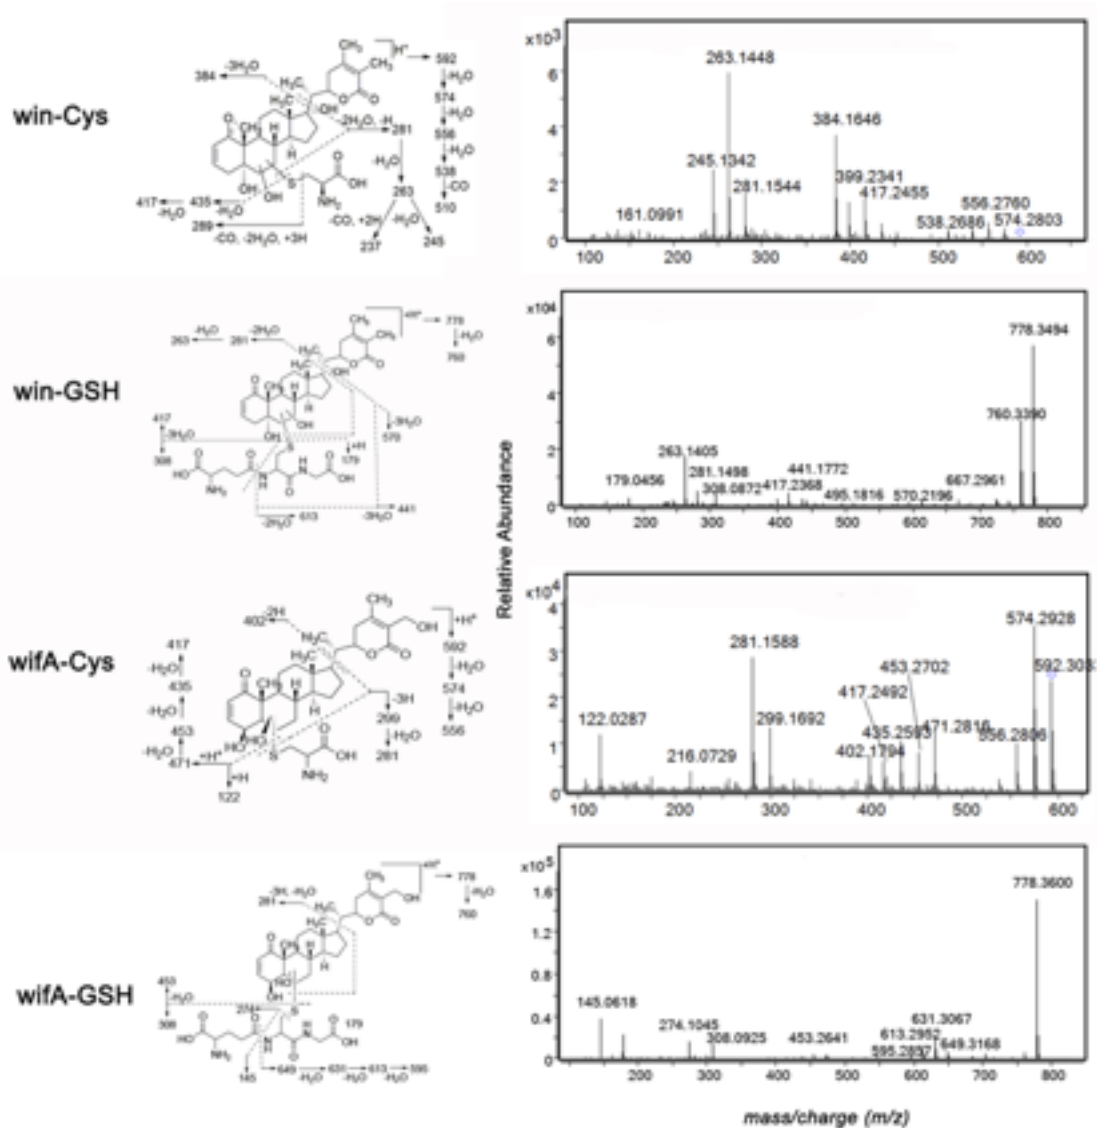

**Figure S3:** Effect of win and wifA on HepG2 and A549 cells. A) 2D culture B) Organoid like culture

**A**

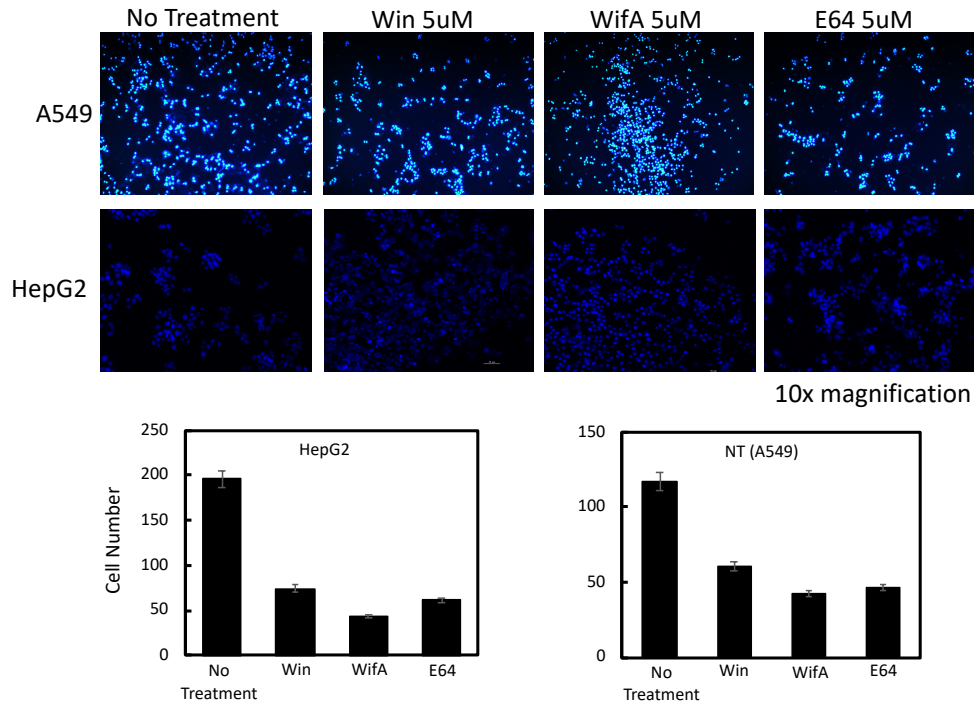

**B**

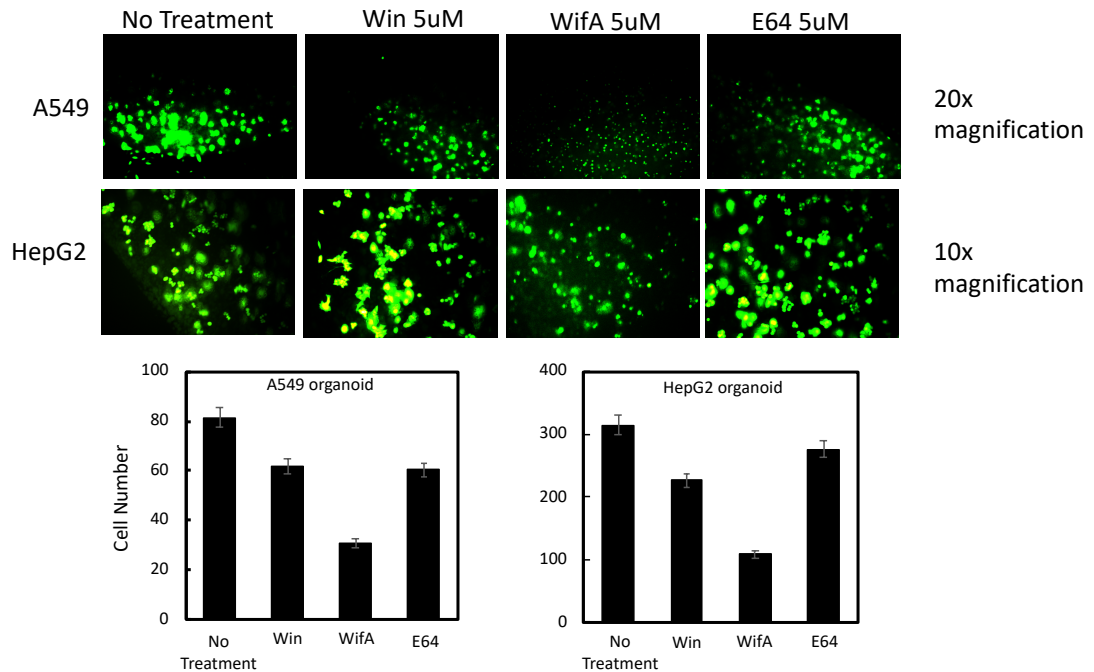

**Figure S4:** Expression and purification of M<sup>pro</sup>. A) Image of a polyacrylamide gel showing the various purified fractions and the purity of isolated M<sup>pro</sup> B) Image of western blot.

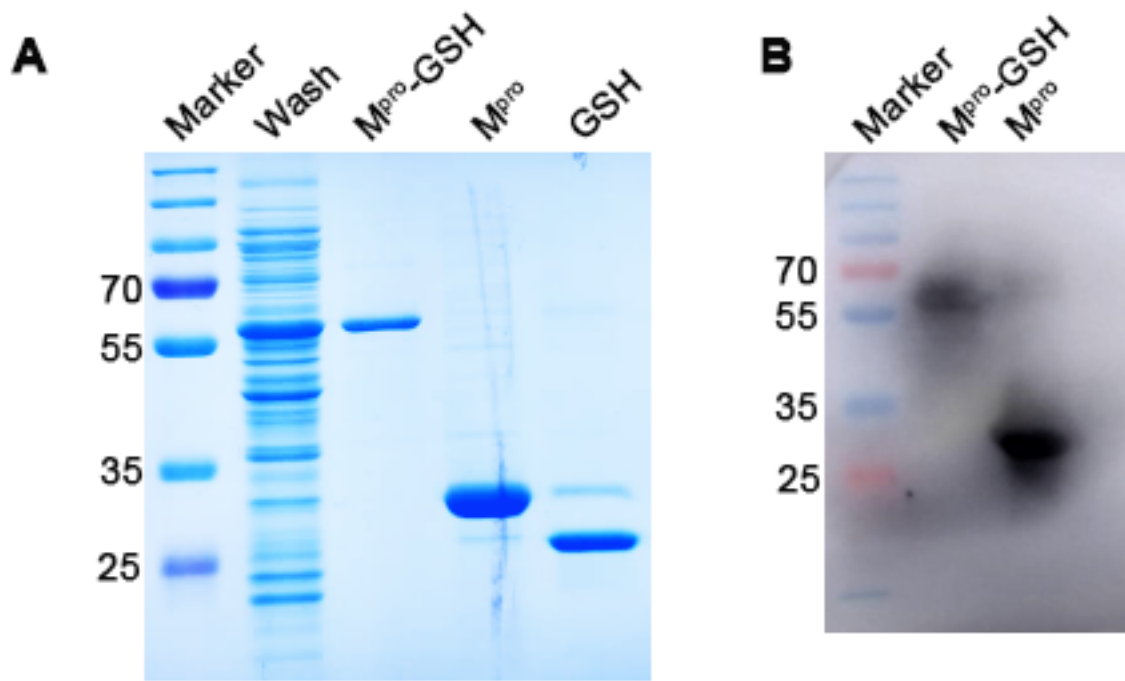

**Figure S5:** Inhibition of protease activity of M<sup>pro</sup> by wifA. A. Purified M<sup>pro</sup> (0.5  $\mu$ M) was preincubated for 5-120 min with 5  $\mu$ M of wifA before adding the substrate DABCYL-KTSAVLQSGFRKME-EDANS and measuring fluorescence over time B. Purified M<sup>pro</sup> (0.25  $\mu$ M) was preincubated for 5-120 min with 0.5  $\mu$ M of wifA before adding the substrate DABCYL-KTSAVLQSGFRKME-EDANS and measuring fluorescence over time C. FRET-based kinetic assay demonstrating the percent inhibition of protease activity of the recombinant M<sup>pro</sup> (0.5  $\mu$ M) following preincubation with an increasing concentration of wifA in the presence of GSH (5 mM). The error bars represent standard deviation of two replicates.

**A**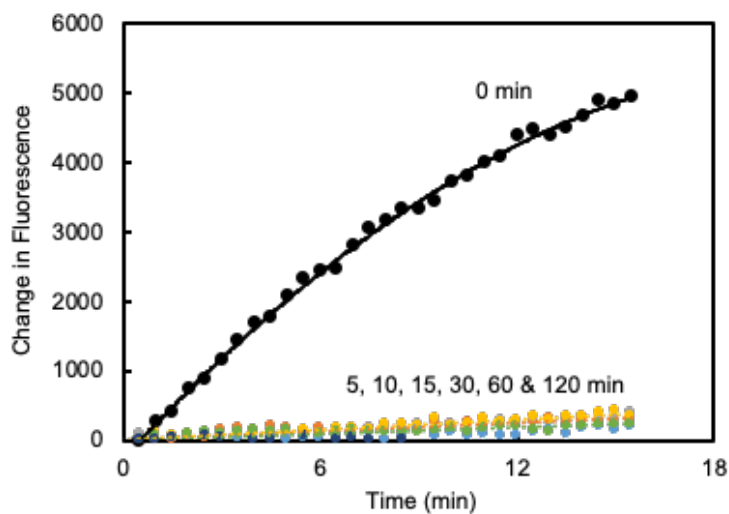

**B**

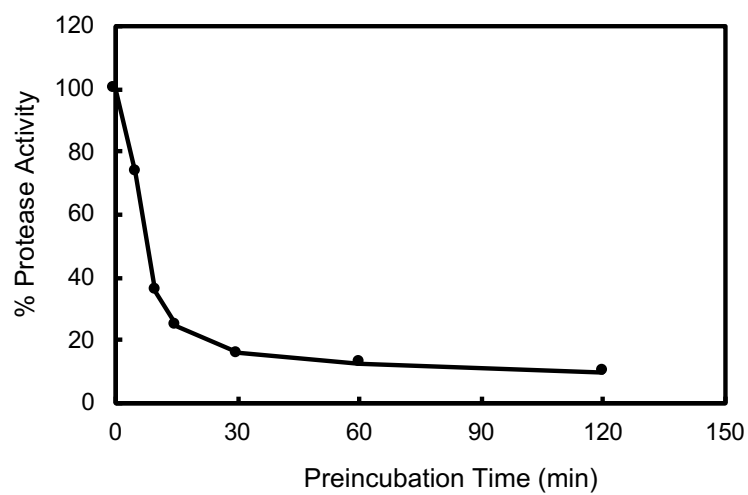

**C**

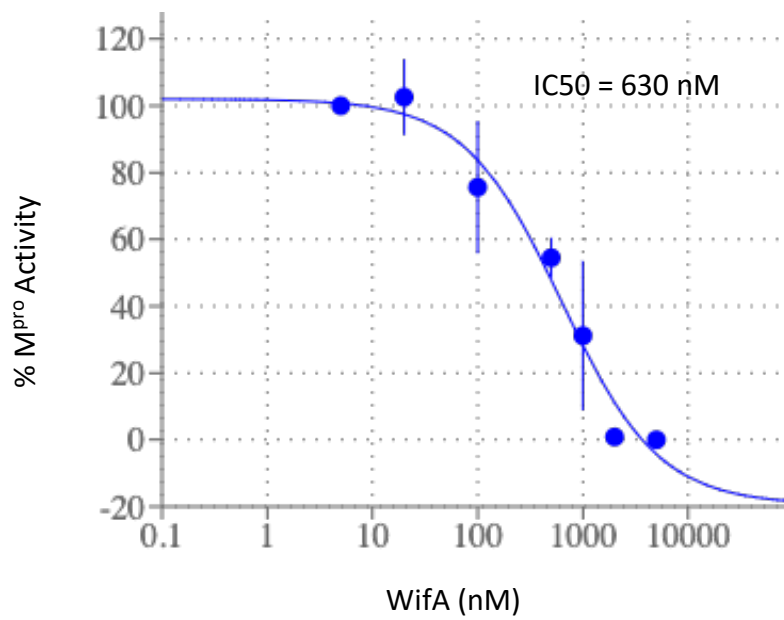

**Figure S6.** Non-covalent binding of win-GSH-epoxide and wifA-GSH-epoxide at the active site of the SARS-CoV-2 cysteine protease M<sup>PRO</sup> using *in silico* docking studies. A) Structures of win-GSH-epoxide and wifA-GSH-epoxide B) Binding parameters of win-GSH-epoxide and wifA-GSH-epoxide at the active site of M<sup>PRO</sup> C-D) Binding of win-GSH-epo-1/2 at the active site of M<sup>PRO</sup> E-F) Binding of wifA-GSH-epo-1/2 at the active site of M<sup>PRO</sup>.

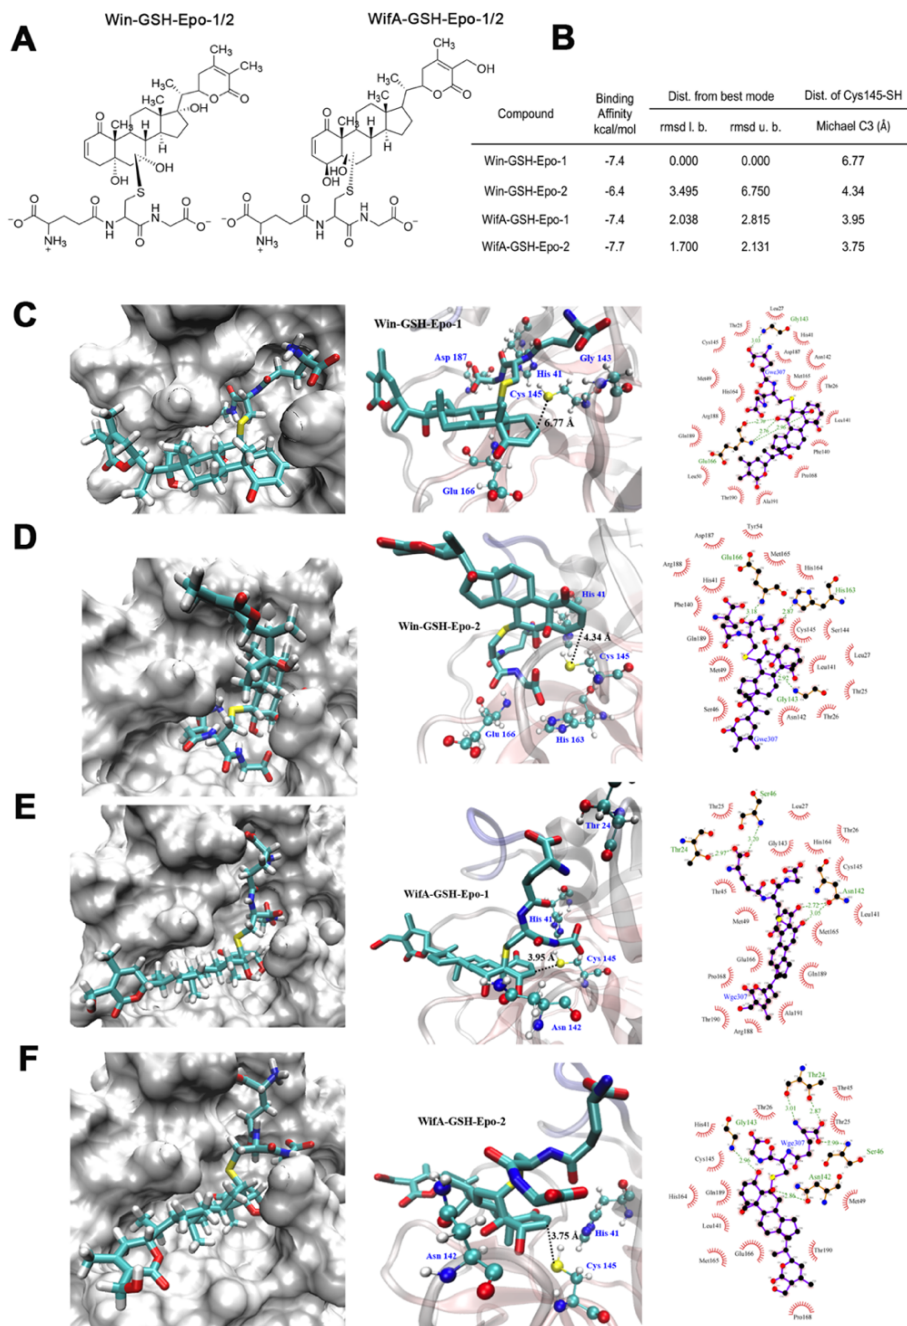

Supplement: NIHMS2030112-supplement-Supplementary_Info.pdf [file NIHMS2030112-supplement-Supplementary_Info.pdf]
